# Supplementary material
Source: publisher figshare collection journal article supplement (https://gsapubs.figshare.com/ndownloader/files/23318012)
Supplement: Supplementary file 1 [file 23318012]

## Sheet: data
File	Comment	δ18O ‰ VSMOW	2SD (ext.)	δ18O ‰ measured	2SE (int.)	X	Y	16OH/16O	Include in final analysis?	Reason for removal from final analysis?	Phase Type
20170918@566.asc	02_SFE2_9840_2_B3_001	14.9405	0.372804	6.812	0.27	-2183	253	0.000195878	Y		D
20170918@567.asc	02_SFE2_9840_2_B3_002	24.0676	0.372804	15.866	0.224	-2185	213	0.000130616	Y		A
20170918@568.asc	02_SFE2_9840_2_B3_003	23.5495	0.372804	15.352	0.249	-2185	203	0.000138572	Y		A
20170918@569.asc	02_SFE2_9840_2_B3_004	23.8912	0.372804	15.691	0.283	-2185	193	0.000132128	Y		A
20170918@570.asc	02_SFE2_9840_2_B3_005	13.8075	0.372804	5.688	0.286	-2267	199	0.000164692	Y		D
20170918@571.asc	02_SFE2_9840_2_B3_006	21.0787	0.372804	12.901	0.488	-2229	175	0.00029293	Y		A
20170918@572.asc	02_SFE2_9840_2_B3_007	20.3872	0.372804	12.215	0.281	-2215	175	0.000245814	Y		A
20170918@573.asc	02_SFE2_9840_2_B3_008	25.3287	0.372804	17.117	0.246	-2195	177	0.000151032	Y		A
20170918@574.asc	02_SFE2_9840_2_B3_009	12.2964	0.372804	4.189	0.261	-2397	179	0.000129228	Y		D
20170918@575.asc	02_SFE2_9840_2_B3_010	12.4143	0.372804	4.306	0.314	-2413	179	0.000182104	Y		D
20170918@576.asc	02_SFE2_9840_2_B3_011	25.3519	0.372804	17.14	0.243	-2383	181	0.000146202	Y		A
20170918@577.asc	02_SFE2_9840_2_B3_012	23.5152	0.372804	15.318	0.264	-2373	189	0.000145559	Y		A
20170918@578.asc	02_SFE2_9840_2_B3_013	23.117	0.372804	14.923	0.254	-2365	197	0.00014072	Y		A
20170918@579.asc	02_SFE2_9840_2_B3_014	23.5717	0.372804	15.374	0.225	-2363	205	0.000136497	Y		A
20170918@580.asc	02_SFE2_9840_2_B3_015	23.7481	0.372804	15.549	0.27	-2357	171	0.000181334	Y		A
20170918@581.asc	02_SFE2_9840_2_B3_016	19.6271	0.372804	11.461	0.37	-2380	95	0.000144369	N	mixed phases	M
20170918@582.asc	02_SFE2_9840_2_B3_017	24.8096	0.372804	16.602	0.33	-2376	85	0.000142214	Y		A
20170918@587.asc	02_SFE2_9840_2_B3_018	22.7099	0.241897	14.493	0.251	-2007	-479	0.000128034	Y		A
20170918@588.asc	02_SFE2_9840_2_B3_019	23.3672	0.241897	15.145	0.311	-1997	-489	0.00013977	Y		A
20170918@589.asc	02_SFE2_9840_2_B3_020	12.519	0.241897	4.384	0.33	-1995	-501	0.000154142	N	mixed phases	M
20170918@590.asc	02_SFE2_9840_2_B3_021	12.0029	0.241897	3.872	0.288	-1985	-507	0.000150453	Y		D
20170918@591.asc	02_SFE2_9840_2_B3_022	24.1847	0.241897	15.956	0.374	-1935	-493	0.000565027	N	aberrant OH behavior	A
20170918@592.asc	02_SFE2_9840_2_B3_023	24.9146	0.241897	16.68	0.275	-1933	-483	0.000148397	Y		A
20170918@593.asc	02_SFE2_9840_2_B3_024	25.1263	0.241897	16.89	0.269	-1929	-473	0.000148263	Y		A
20170918@594.asc	02_SFE2_9840_2_B3_025	25.589	0.241897	17.349	0.247	-1929	-463	0.000148571	Y		A
20170918@595.asc	02_SFE2_9840_2_B3_026	22.9216	0.241897	14.703	0.191	-1930	-450	0.000253783	N	aberrant OH behavior	A
20170918@596.asc	02_SFE2_9840_2_B3_027	14.4263	0.241897	6.276	0.258	-2051	-318	0.000140519	Y		D
20170918@597.asc	02_SFE2_9840_2_B3_028	15.3215	0.241897	7.164	0.162	-2096	-314	0.000140818	Y		D
20170918@598.asc	02_SFE2_9840_2_B3_029	24.1716	0.241897	15.943	0.296	-2116	-275	0.000213761	Y		B1
20170918@599.asc	02_SFE2_9840_2_B3_030	23.0799	0.241897	14.86	0.292	-2109	-259	0.000383821	Y		B1
20170918@600.asc	02_SFE2_9840_2_B3_031	23.9247	0.241897	15.698	0.253	-2109	-249	0.000158535	Y		B1
20170918@601.asc	02_SFE2_9840_2_B3_032	24.088	0.241897	15.86	0.233	-2147	-257	0.000216223	Y		B1
20170918@602.asc	02_SFE2_9840_2_B3_033	22.5849	0.241897	14.369	0.263	-2077	-253	0.000218184	Y		B1
20170918@603.asc	02_SFE2_9840_2_B3_034	22.847	0.241897	14.629	0.244	-2035	-249	0.000150696	Y		B2
20170918@604.asc	02_SFE2_9840_2_B3_035	23.6484	0.241897	15.424	0.249	-2047	-249	0.000172395	Y		B2
20170918@605.asc	02_SFE2_9840_2_B3_036	22.4347	0.241897	14.22	0.165	-2120	-223	0.000175852	Y		B1
20170918@606.asc	02_SFE2_9840_2_B3_037	23.848	0.241897	15.622	0.405	-2120	-211	0.00064366	Y		B1
20170918@611.asc	02_SFE2_9840_2_B3_038	17.8907	0.391574	9.615	1.229	-2026	-297	0.00461774	N	aberrant OH behavior	M
20170918@612.asc	02_SFE2_9840_2_B3_039	23.5326	0.391574	15.211	0.242	-2030	-285	0.000152289	Y		B1
20170918@613.asc	02_SFE2_9840_2_B3_040	23.6032	0.391574	15.281	0.32	-2129	-207	0.000271882	Y		B1
20170918@614.asc	02_SFE2_9840_2_B3_041	24.9451	0.391574	16.612	0.257	-2133	-187	0.0001708	Y		B1
20170918@615.asc	02_SFE2_9840_2_B3_042	23.9228	0.391574	15.598	0.19	-2032	-159	0.000162213	Y		B1
20170918@616.asc	02_SFE2_9840_2_B3_043	24.1183	0.391574	15.792	0.248	-2044	-157	0.000179157	Y		B1
20170918@617.asc	02_SFE2_9840_2_B3_044	15.1162	0.391574	6.863	0.288	-2118	-154	0.000147521	Y		D
20170918@618.asc	02_SFE2_9840_2_B3_045	22.8268	0.391574	14.511	0.309	-2073	-142	0.000230919	Y		B1
20170918@619.asc	02_SFE2_9840_2_B3_046	23.1343	0.391574	14.816	0.282	-2079	-124	0.000178317	Y		B1
20170918@620.asc	02_SFE2_9840_2_B3_047	23.1817	0.391574	14.863	0.207	-2083	-109	0.000188675	Y		B1
20170918@621.asc	02_SFE2_9840_2_B3_048	22.6968	0.391574	14.382	0.235	-2087	-96	0.000464817	Y		B1
20170918@622.asc	02_SFE2_9840_2_B3_049	22.1927	0.391574	13.882	0.724	-2093	-89	0.000259967	Y		B1
20170918@623.asc	02_SFE2_9840_2_B3_050	14.8631	0.391574	6.612	0.36	-2092	-73	0.000159722	Y		D
20170918@624.asc	02_SFE2_9840_2_B3_051	23.1313	0.391574	14.813	0.22	-2072	-57	0.000162149	Y		B1
20170918@625.asc	02_SFE2_9840_2_B3_052	24.4742	0.391574	16.145	0.276	-2089	-44	0.000180162	Y		B1
20170918@626.asc	02_SFE2_9840_2_B3_053	25.0156	0.391574	16.682	0.247	-2086	-21	0.000295629	Y		B1
20170918@627.asc	02_SFE2_9840_2_B3_054	24.6779	0.391574	16.347	0.335	-2107	0	0.000566984	Y		B1
20170918@628.asc	02_SFE2_9840_2_B3_055	24.5307	0.391574	16.201	0.258	-2059	-13	0.000162616	Y		B1
20170918@633.asc	02_SFE2_9840_2_B3_056	24.26	0.150173	15.806	0.308	-2109	19	0.000398749	Y		B1
20170918@634.asc	02_SFE2_9840_2_B3_057	24.2106	0.150173	15.757	0.275	-2121	37	0.000489439	Y		B1
20170918@635.asc	02_SFE2_9840_2_B3_058	24.4364	0.150173	15.981	0.248	-2105	54	0.000164603	Y		B1
20170918@636.asc	02_SFE2_9840_2_B3_059	23.9555	0.150173	15.504	0.313	-2101	63	0.000224153	Y		B1
20170918@637.asc	02_SFE2_9840_2_B3_060	24.0291	0.150173	15.577	0.283	-2113	82	0.000170236	Y		B1
20170918@638.asc	02_SFE2_9840_2_B3_061	23.4442	0.150173	14.997	0.211	-2120	95	0.000213029	Y		B1
20170918@639.asc	02_SFE2_9840_2_B3_062	22.3089	0.150173	13.871	0.229	-2127	116	0.000177464	Y		B1
20170918@640.asc	02_SFE2_9840_2_B3_063	24.2489	0.150173	15.795	0.281	-2131	101	0.000170346	Y		B1
20170918@641.asc	02_SFE2_9840_2_B3_064	24.1843	0.150173	15.731	0.273	-2130	128	0.000238732	Y		B1
20170918@642.asc	02_SFE2_9840_2_B3_065	24.3366	0.150173	15.882	0.258	-2129	143	0.000169809	Y		B1
20170918@643.asc	02_SFE2_9840_2_B3_066	24.2267	0.150173	15.773	0.266	-2128	152	0.000161246	Y		B1
20170918@644.asc	02_SFE2_9840_2_B3_067	23.7346	0.150173	15.285	0.298	-2120	190	0.000885051	Y		B1
20170918@645.asc	02_SFE2_9840_2_B3_068	22.0901	0.150173	13.654	0.329	-2117	213	0.00015422	Y		B1
20170918@646.asc	02_SFE2_9840_2_B3_069	23.7316	0.150173	15.282	0.319	-2134	207	0.000311731	Y		B1
20170918@647.asc	02_SFE2_9840_2_B3_070	24.258	0.150173	15.804	0.317	-2146	172	0.000168093	Y		B1
20170918@648.asc	02_SFE2_9840_2_B3_071	18.3058	0.150173	9.901	2.753	-2130	237	0.00384598	N	aberrant OH behavior	B1
20170918@649.asc	02_SFE2_9840_2_B3_072	23.536	0.150173	15.088	0.219	-2108	256	0.000474585	N	aberrant OH behavior
20170918@650.asc	02_SFE2_9840_2_B3_073	23.7407	0.150173	15.291	0.217	-2089	232	0.000149846	Y		B2
20170918@651.asc	02_SFE2_9840_2_B3_074	24.0039	0.150173	15.552	0.188	-2072	232	0.000141729	Y		B2
20170918@652.asc	02_SFE2_9840_2_B3_075	26.0255	0.150173	17.557	0.291	-2175	64	0.000138688	Y		B2
20170918@653.asc	02_SFE2_9840_2_B3_076	25.4185	0.150173	16.955	0.307	-2159	64	0.000144463	Y		B2
20170918@654.asc	02_SFE2_9840_2_B3_077	24.5211	0.150173	16.065	0.182	-2036	161	0.000135659	Y		B2
20170918@655.asc	02_SFE2_9840_2_B3_078	23.901	0.150173	15.45	0.207	-1904	254	0.00015693	Y		A
20170918@660.asc	02_SFE2_9840_2_B3_079	23.7511	0.274388	15.291	0.304	-1906	261	0.000209186	Y		A
20170918@661.asc	02_SFE2_9840_2_B3_080	24.4076	0.274388	15.942	0.209	-1877	232	0.00016395	Y		A
20170918@662.asc	05_SFOT1_10106_85_B1_001	22.9687	0.274388	14.515	0.274	2273	-766	0.000201258	Y		B1
20170918@663.asc	05_SFOT1_10106_85_B1_002	23.5787	0.274388	15.12	0.277	2309	-762	0.000161372	Y		B2
20170918@664.asc	05_SFOT1_10106_85_B1_003	23.6624	0.274388	15.203	0.229	2321	-760	0.000182202	Y		B2
20170918@665.asc	05_SFOT1_10106_85_B1_004	23.5364	0.274388	15.078	0.325	2333	-758	0.000213102	Y		B2
20170918@666.asc	05_SFOT1_10106_85_B1_005	23.8177	0.274388	15.357	0.19	2345	-756	0.00015082	Y		B2
20170918@667.asc	05_SFOT1_10106_85_B1_006	24.0425	0.274388	15.58	0.221	2357	-754	0.000146149	Y		B2
20170918@668.asc	05_SFOT1_10106_85_B1_007	24.1373	0.274388	15.674	0.232	2369	-752	0.000143317	Y		B2
20170918@669.asc	05_SFOT1_10106_85_B1_008	24.0889	0.274388	15.626	0.227	2381	-750	0.000144947	Y		B2
20170918@670.asc	05_SFOT1_10106_85_B1_009	24.216	0.274388	15.752	0.223	2393	-748	0.000163843	Y		B2
20170918@671.asc	05_SFOT1_10106_85_B1_010	21.8313	0.274388	13.387	0.314	2405	-746	0.000429549	N	aberrant OH behavior	B2
20170918@672.asc	05_SFOT1_10106_85_B1_011	24.2331	0.274388	15.769	0.228	2401	-734	0.000346247	N	aberrant OH behavior	B2
20170918@673.asc	05_SFOT1_10106_85_B1_012	22.6803	0.274388	14.229	0.237	2267	-720	0.0001741	Y		B1
20170918@674.asc	05_SFOT1_10106_85_B1_013	24.826	0.274388	16.357	0.249	2103	-755	0.000158024	Y		B2
20170918@675.asc	05_SFOT1_10106_85_B1_014	24.828	0.274388	16.359	0.266	2083	-753	0.000199189	Y		B2
20170918@676.asc	05_SFOT1_10106_85_B1_015	23.2913	0.274388	14.835	0.193	1943	-966	0.000133128	Y		B2
20170918@677.asc	05_SFOT1_10106_85_B1_016	23.3478	0.274388	14.891	0.236	1934	-989	0.000282006	Y		B1
20170918@678.asc	05_SFOT1_10106_85_B1_017	23.6543	0.274388	15.195	0.278	2025	-867	0.000151512	Y		B2
20170918@679.asc	05_SFOT1_10106_85_B1_018	23.9931	0.274388	15.531	0.239	2041	-799	0.000174859	Y		B2
20170918@684.asc	05_SFOT1_10106_85_B1_019	22.8595	0.323066	14.423	0.285	1858	-853	0.000200993	Y		B1
20170918@685.asc	05_SFOT1_10106_85_B1_020	23.5885	0.323066	15.146	0.278	1856	-792	0.000165343	Y		B1
20170918@686.asc	05_SFOT1_10106_85_B1_021	23.0309	0.323066	14.593	0.289	1849	-711	0.000187832	Y		B1
20170918@687.asc	05_SFOT1_10106_85_B1_022	23.4877	0.323066	15.046	0.285	1936	-785	0.000233634	Y		B1
20170918@688.asc	05_SFOT1_10106_85_B1_023	22.7526	0.323066	14.317	0.258	1884	-938	0.000179121	Y		B1
20170918@689.asc	05_SFOT1_10106_85_B1_024	23.1237	0.323066	14.685	0.25	1917	-1086	0.000189904	Y		B1
20170918@690.asc	05_SFOT1_10106_85_B1_025	23.2719	0.323066	14.832	0.264	1848	-446	0.000173907	Y		B1
20170918@691.asc	05_SFOT1_10106_85_B1_026	22.6749	0.323066	14.24	0.235	2256	-828	0.000173369	Y		B1
20170918@692.asc	05_SFOT1_10106_85_B1_027	22.918	0.323066	14.481	0.23	2250	-848	0.000656575	Y		B1
20170918@693.asc	05_SFOT1_10106_85_B1_028	23.3616	0.323066	14.921	0.216	2197	-796	0.00029677	Y		B2
20170918@694.asc	05_SFOT1_10106_85_B1_029	23.2426	0.323066	14.803	0.277	2197	-780	0.000166977	Y		B2
20170918@695.asc	05_SFOT1_10106_85_B1_030	23.7317	0.323066	15.288	0.232	2177	-820	0.000170212	Y		B2
20170918@696.asc	05_SFOT1_10106_85_B1_031	23.6439	0.323066	15.201	0.266	2197	-820	0.000151631	Y		B2
20170918@697.asc	05_SFOT1_10106_85_B1_032	24.1027	0.323066	15.656	0.273	2157	-780	0.000175363	Y		B2
20170918@698.asc	05_SFOT1_10106_85_B1_033	24.381	0.323066	15.932	0.263	2137	-760	0.000175334	Y		B2
20170918@699.asc	05_SFOT1_10106_85_B1_034	24.5373	0.323066	16.087	0.223	2111	-740	0.000181805	Y		B2
20170918@700.asc	05_SFOT1_10106_85_B1_035	24.9618	0.323066	16.508	0.336	2049	-410	0.000222019	Y		B2
20170918@701.asc	05_SFOT1_10106_85_B1_036	22.554	0.323066	14.12	0.347	2265	-917	0.00339382	Y		B1
20170918@702.asc	05_SFOT1_10106_85_B1_037	22.6699	0.323066	14.235	0.229	2265	-929	0.000185286	Y		B1
20170918@703.asc	05_SFOT1_10106_85_B1_038	22.6276	0.323066	14.193	0.225	2277	-813	0.000183412	Y		B1
20170918@709.asc	05_SFOT1_10106_85_B1_039	22.8878	0.289669	14.452	0.249	2261	-669	0.000176511	Y		B1
20170918@710.asc	05_SFOT1_10106_85_B1_040	22.9594	0.289669	14.523	0.302	2229	-628	0.000166574	Y		B1
20170918@711.asc	05_SFOT1_10106_85_B1_041	22.9624	0.289669	14.526	0.245	2204	-555	0.000186779	Y		B1
20170918@712.asc	05_SFOT1_10106_85_B1_042	22.794	0.289669	14.359	0.388	2252	-491	0.000901213	Y		B1
20170918@713.asc	05_SFOT1_10106_85_B1_043	22.9725	0.289669	14.536	0.267	2220	-460	0.000212699	Y		B1
20170918@714.asc	05_SFOT1_10106_85_B1_044	23.0794	0.289669	14.642	0.236	2198	-410	0.000181878	Y		B1
20170918@715.asc	05_SFOT1_10106_85_B1_045	23.7832	0.289669	15.34	0.227	2213	-368	0.000148342	Y		B1
20170918@716.asc	05_SFOT1_10106_85_B1_046	22.6932	0.289669	14.259	0.336	2216	-383	0.000302653	Y		B1
20170918@717.asc	05_SFOT1_10106_85_B1_047	22.8535	0.289669	14.418	0.243	2236	-383	0.000184829	Y		B1
20170918@718.asc	05_SFOT1_10106_85_B1_048	22.8455	0.289669	14.41	0.29	2183	-319	0.000368321	Y		B1
20170918@719.asc	05_SFOT1_10106_85_B1_049	23.5947	0.289669	15.153	0.426	2160	-240	0.0099548	N	aberrant OH behavior	B1
20170918@720.asc	05_SFOT1_10106_85_B1_050	22.9019	0.289669	14.466	0.249	2174	-205	0.00017111	Y		B1
20170918@721.asc	05_SFOT1_10106_85_B1_051	23.0824	0.289669	14.645	0.269	2177	-226	0.000194411	Y		B1
20170918@722.asc	05_SFOT1_10106_85_B1_052	23.4414	0.289669	15.001	0.214	2198	-254	0.000194674	Y		B1
20170918@723.asc	05_SFOT1_10106_85_B1_053	23.2962	0.289669	14.857	0.274	2207	-271	0.000212672	Y		B1
20170918@728.asc	05_SFOT1_10106_85_B1_054	23.089	0.245115	14.628	0.206	1891	-449	0.00018123	Y		B1
20170918@729.asc	05_SFOT1_10106_85_B1_055	23.1414	0.245115	14.68	0.258	1802	-500	0.000170904	Y		B1
20170918@730.asc	05_SFOT1_10106_85_B1_055	23.8432	0.245115	15.376	0.283	1732	-534	0.000161227	Y		B2
20170918@731.asc	05_SFOT1_10106_85_B1_056	24.7648	0.245115	16.29	0.288	2366	-532	0.000161843	Y		B2
20170918@732.asc	05_SFOT1_10106_85_B1_057	12.934	0.245115	4.557	0.189	2480	-166	0.000218829	N	aberrant OH behavior	D
20170918@733.asc	05_SFOT1_10106_85_B1_058	22.5394	0.245115	14.083	0.266	2480	-188	0.00019741	Y		A
20170918@734.asc	05_SFOT1_10106_85_B1_059	22.9952	0.245115	14.535	0.221	2479	-231	0.000167726	Y		A
20170918@735.asc	05_SFOT1_10106_85_B1_060	22.1764	0.245115	13.723	0.188	2527	-134	0.00140069	N	aberrant OH behavior	A
20170918@736.asc	05_SFOT1_10106_85_B1_060	22.2924	0.245115	13.838	0.218	2529	-118	0.000201795	Y		A
KEY
Column Name	Meaning
File	General analysis name following WiscSIMS session naming conventions.
Comment	Specific analysis name reflecting sample name and analyzed region.
δ18O ‰ VSMOW	Final corrected δ18O value, reported in VSMOW.
2SD (ext.)	2 standard deviation external error; made on a bracketing standard of known δ18O composition. Bracketing standard analyses can be found in Appendix B.
X	Instrumental coordinate of analysis in the x direction, measured in µm.
Y	Instrumental coordinate of analysis in the y direction, measured in µm.
16OH/16O	Measured 16O1H/16O ratio; high values may be an indication of contamination.
Include in final analysis?	Y = Yes, N = No; denotes if analysis will be considered during data interpretation.
Reason for removal from final analysis?	Reason analysis was removed from interpretation. Samples were only removed due to aberrant OH behavior if the OH increase constituted a prolonged period of elevated OH values, as opposed to the short pulsed behavior of intercepted fluid inclusions (see Appendix C for more on this methodology).
Phase Type	Petrographic phase of quartz; D = Detrital grains, A = Authigenic (quartz overgrowths), B1 = Gap Deposits (fracture-parallel quartz bridge growth; first part of bridges to form), B2 = Lateral Deposits (fracture-perpendicular quartz bridge growth; quartz growth around original bridge, into empty fracture space).
Included in Denny et al., 2019: A History of Pore Water Oxygen Isotope Evolution in the Cretaceous Travis Peak Formation.
This is a simplified version of the data contained in Appendix B.
